# Supplementary material for: Development of novel monoclonal antibodies with specific binding affinity for denatured human CD26 in formalin-fixed paraffin-embedded and decalcified specimens
Source: PubMed Central journal article supplement (PMC6564021; doi:10.1371/journal.pone.0218330), 2019-06-13

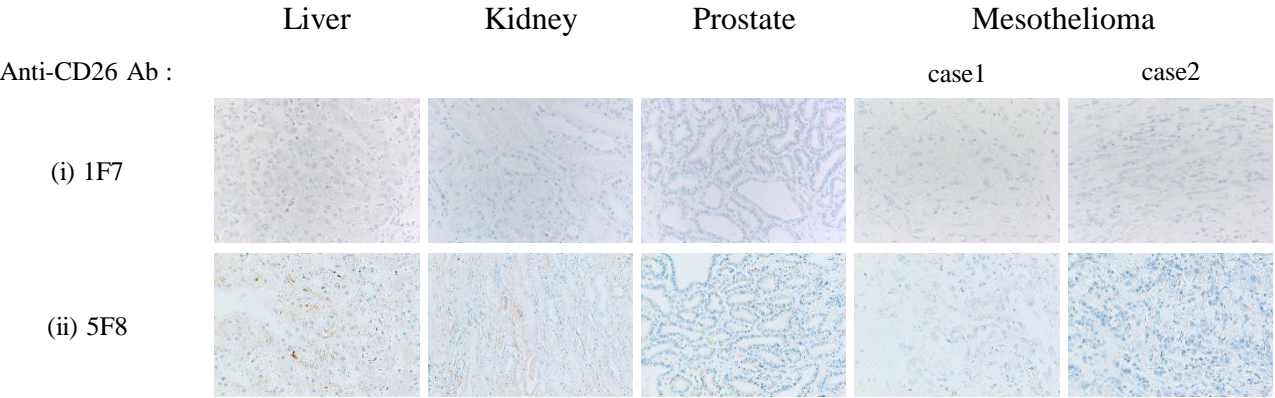

Supplement: pone.0218330.s003.pdf [file pone.0218330.s003.pdf]
